# Supplementary material for: Multifunctional BODIPY derivatives to image cancer cells and sense copper(ii) ions in living cells
Source: Royal Society of Chemistry journal article supplement (doi:10.1039/c3ra22907f), 2013-01-01
Supplement: c3ra22907f.pdf [file c3ra22907f.pdf]

**Electronic Supporting Information (ESI):**

**Multifunctional BODIPY derivatives to image cancer cells and sense copper(II) ions in living cells.**

Zan Li, Qiu-Yun Chen\*, Pei-Dong Wang, Yi Wu

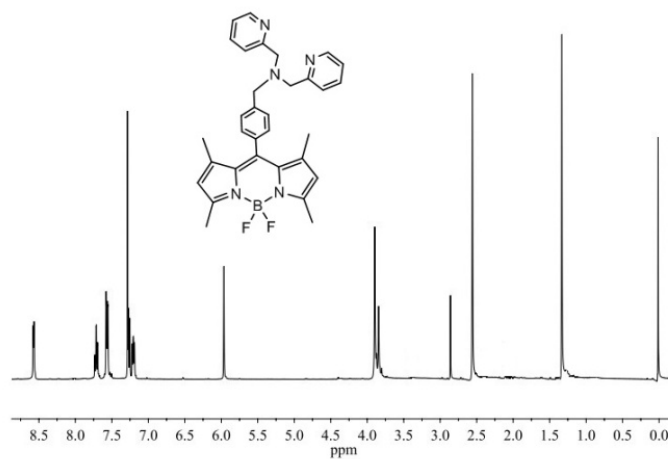

**Fig. S1(a)** <sup>1</sup>H NMR spectrum of 8-[di(2-picoly)amine-4-benzyl]-4,4-difluoro-1,3,5,7-tetramethyl-4-bora-3a,4a-diaza-s-indacene (**L1**) in chloroform (CDCl<sub>3</sub>).

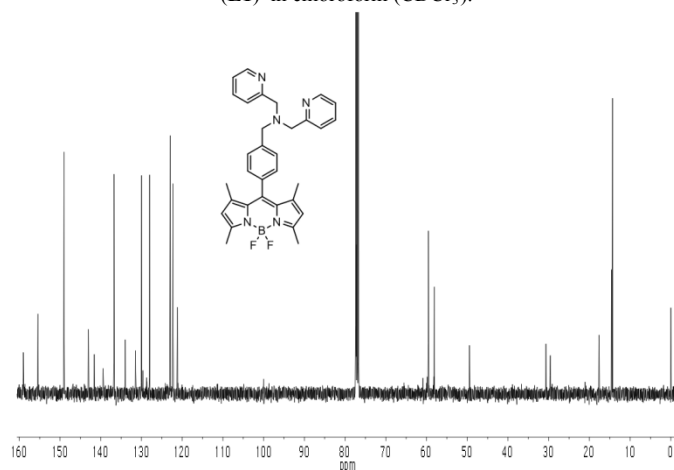

**Fig. S1(b)** <sup>13</sup>C NMR spectrum of 8-[di(2-picoly)amine-4-benzyl]-4,4-difluoro-1,3,5,7-tetramethyl-4-bora-3a,4a-diaza-s-indacene (**L1**) in chloroform (CDCl<sub>3</sub>).

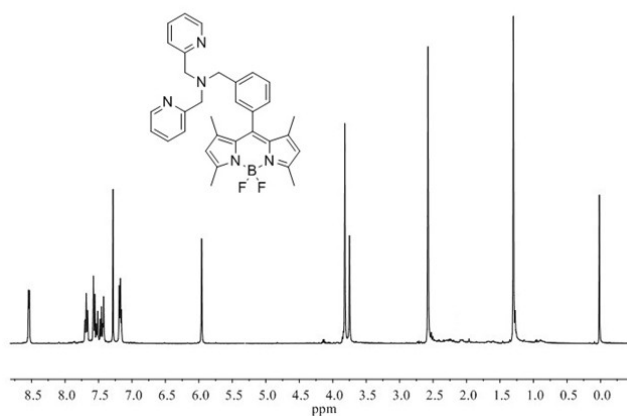

**Fig.S2(a)**  $^1\text{H}$ NMR spectrum of 8-[di(2-picolyl)amine-3-benzyl]-4,4-difluoro-1,3,5,7-tetramethyl-4-bora-3a,4a-diaza-s-indacene (**L2**) in chloroform ( $\text{CDCl}_3$ ).

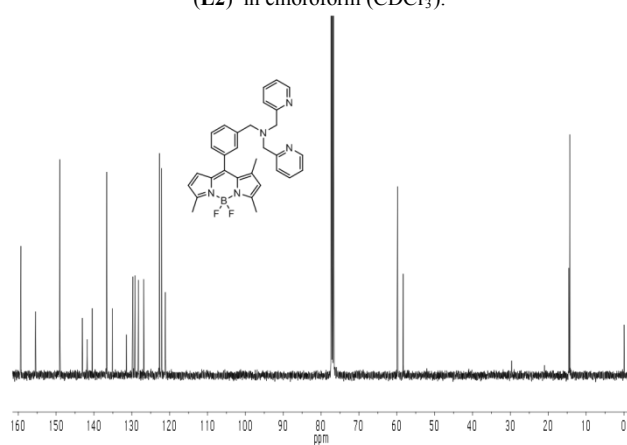

**Fig.S2(b)**  $^{13}\text{C}$ NMR spectrum of 8-[di(2-picolyl)amine-3-benzyl]-4,4-difluoro-1,3,5,7-tetramethyl-4-bora-3a,4a-diaza-s-indacene (**L2**) in chloroform ( $\text{CDCl}_3$ ).

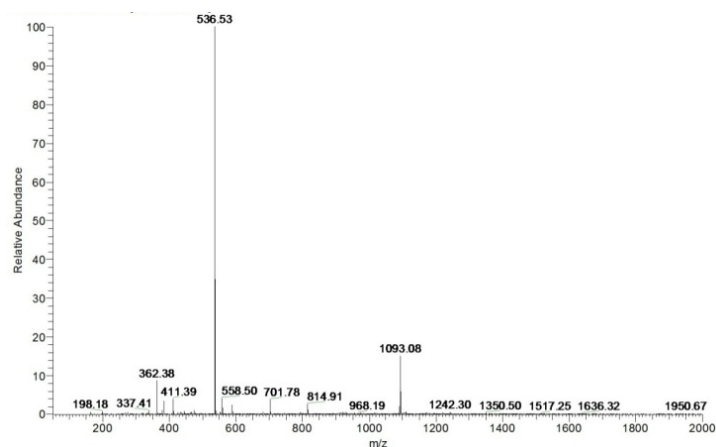

**Fig. S3(a)** ESI-MS spectrum of  $[\text{L1}+\text{H}^+]$ ,  $m/z=536.53$ .

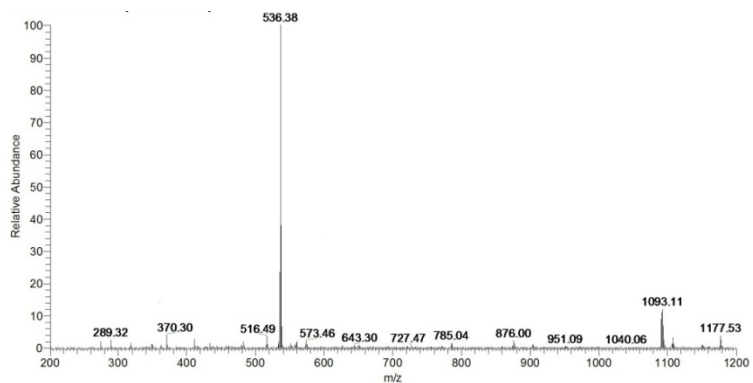

Fig. S3 (b) ESI-MS spectrum of  $[L2+H^+]$ ,  $m/z=536.38$ .

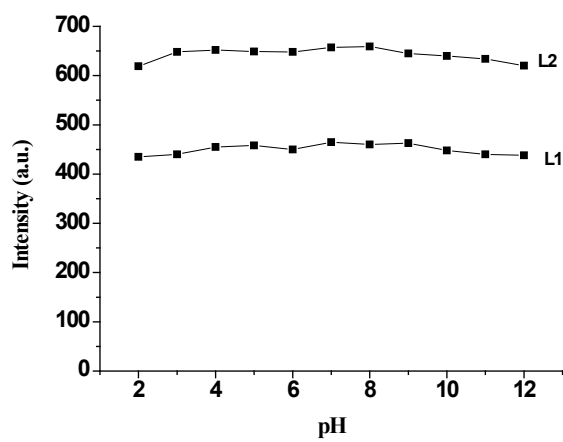

Fig. S4 Fluorescence intensities at 510 nm of L1 and L2 at various pH values. Tris-DMSO (pH 7.4, 9:1, v/v).  $\lambda_{ex}=460$  nm. Slit width was 5 nm. All measurements were taken at 25 °C.

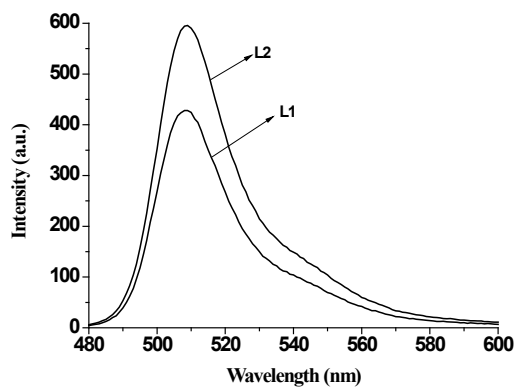

Fig. S5 Fluorescence spectra of probe L1, L2 (2  $\mu$ M) measured in Tris-DMSO (9:1, v/v) solution,  $\lambda_{ex}=460$  nm. Measurements were taken at 25°C, Slit width was 5 nm.

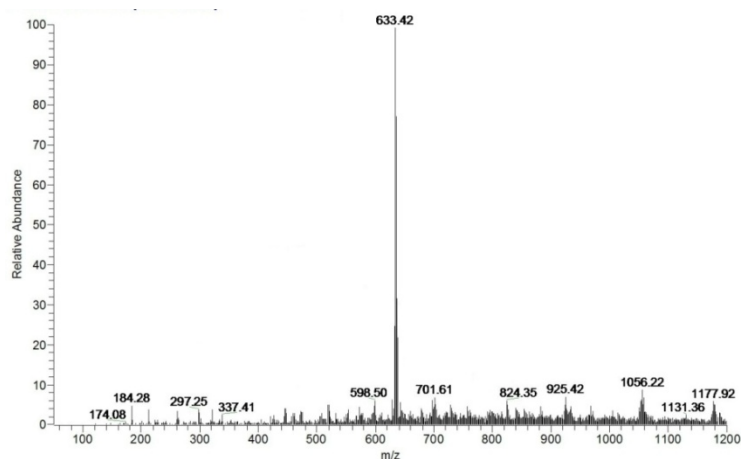

Fig. S6(a) ESI-MS spectrum of [L1+Cu<sup>2+</sup>+Cl<sup>-</sup>], m/z=633.42.

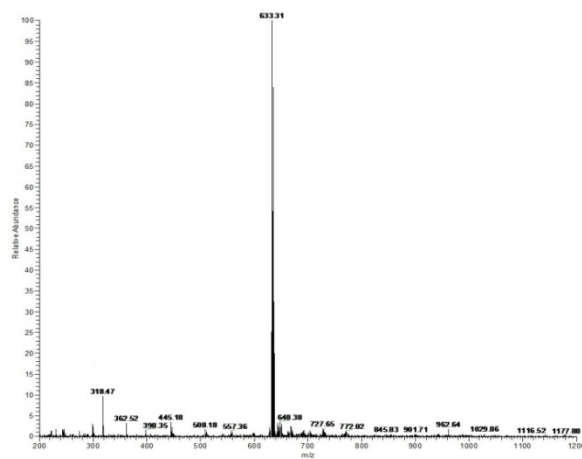

Fig. S6(b) ESI-MS spectrum of [L2+Cu<sup>2+</sup>+Cl<sup>-</sup>], m/z=633.31.

### Determination of quantum yields [1]

Quantum yields were determined at 25°C, Fluorescein ( $\Phi = 0.90$ ) in 0.1 M NaOH was used as a standard. The absorption of standard was adjusted to the same value ( $abs < 0.1$ , 491nm) as that of probe L. Excitation was chosen at 460 nm; the emission spectra were corrected and integrated from 480 to 600 nm. The quantum yields were calculated with the following equation:

$$U_{\text{sample}} = U_{\text{standard}} \times \frac{\int_{\text{emission sample}}}{\int_{\text{emission standard}}}$$

### Association constant[2]

The association constant was calculated from the emission intensity-titration curves according to the equation:

$$I_F^0 / (I_F - I_F^0) = (1/f) [(1/K_s[M]) + 1]$$

Where  $I_F^0$  is the emission intensity of probe L1 and L2 at 510 nm,  $I_F$  is the emission intensity of probe L at 510 nm upon the addition of different amount of  $\text{Cu}^{2+}$ ,  $f$  is the fraction of the initial fluorescence which is accessible to the sensor,  $[M]$  is the concentration of  $\text{Cu}^{2+}$ . The association constant values  $K_S$  is given by the ratio intercept/slope.

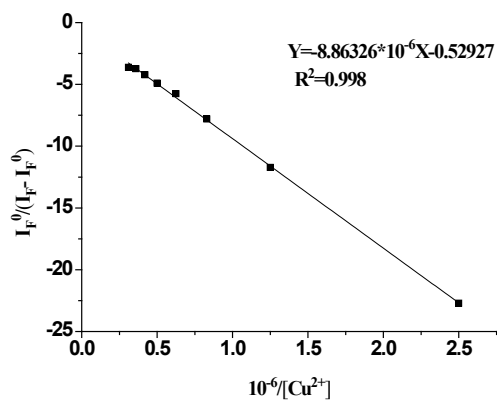

Fig. S7 Fitting of Fluorescence titration curve of L1 in Tris-DMSO (9:1, v/v). The association constant is  $K_S = 5.97 \times 10^4 \text{ M}^{-1}$ .

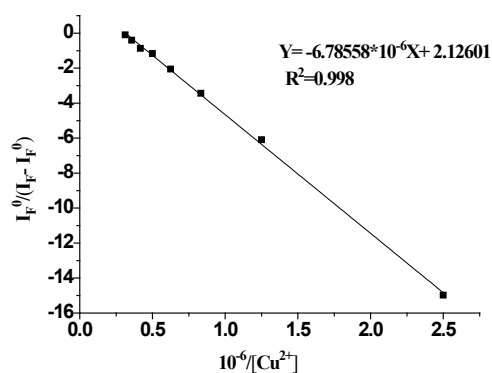

Fig. S8 Fitting of Fluorescence titration curve of L2 in Tris-DMSO (9:1, v/v). The association constant is  $K_S = 3.13 \times 10^5 \text{ M}^{-1}$ .

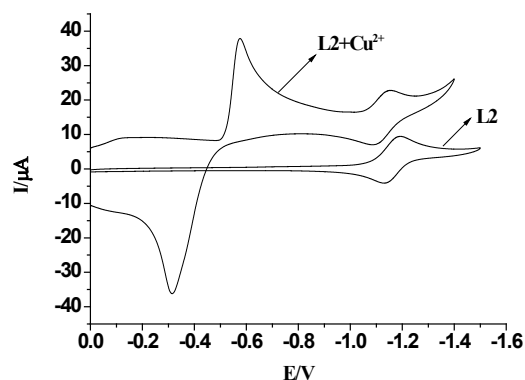

Fig.S9 Cyclic voltammogram of complex  $[\text{L2}+\text{Cu}^{2+}]$  in MeCN + 0.1 M  $\text{Bu}_4\text{NClO}_4$ . Scan rate:  $100 \text{ mV S}^{-1}$ .

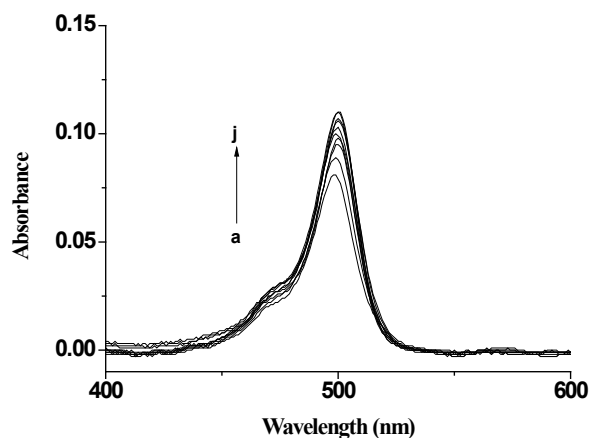

**Fig. S10** UV-vis absorption spectra of probe **L2** (2 μM) in Tris-DMSO (9:1, v/v) solution with titration of Cu<sup>2+</sup> (a-j: 0, 0.4, 0.8, 1.2, 1.6, 2.0, 2.4, 2.8, 3.2, 4.0 μM). All measurements were taken at 25°C, The data were recorded 1 min after Cu<sup>2+</sup> was added.

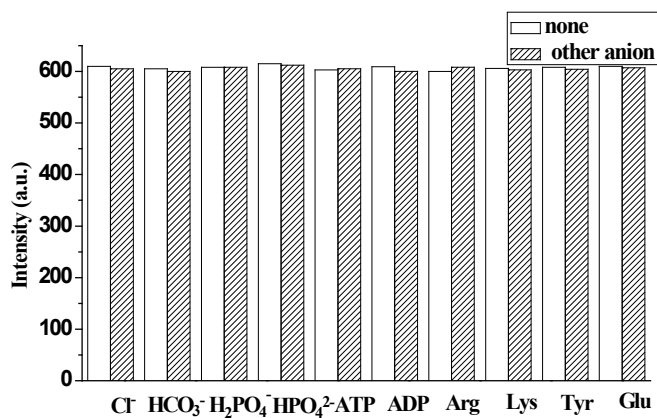

**Fig. S11** Fluorescence of the chemosensor **L2** (2 μM) in the presence of important anions and molecules (2 μM) within cancer cells. Measured in Tris-DMSO (9:1, v/v) solution at 25°C,  $\lambda_{\text{ex}}=460$  nm, Slit width was 5 nm.

### Notes and references

1. J. N. Demas and G. A. Crosby, *J. Phys. Chem.*, 1971, **75**, 991-1024.
2. F.-P. Hou, J. Cheng, P.-X. Xi, F.-J. Chen, L. Huang, G.-Q. Xie, Y.-J. Shi, *Dalton Trans.*, 2012, **41**, 5799 -5804.
